# Supplementary material for: Clinical outcomes comparison of 10 years versus 5 years of adjuvant endocrine therapy in patients with early breast cancer
Source: Springer Nature journal article supplement (doi:10.1186/s12885-018-4878-4), 2018-10-12

Figure S2

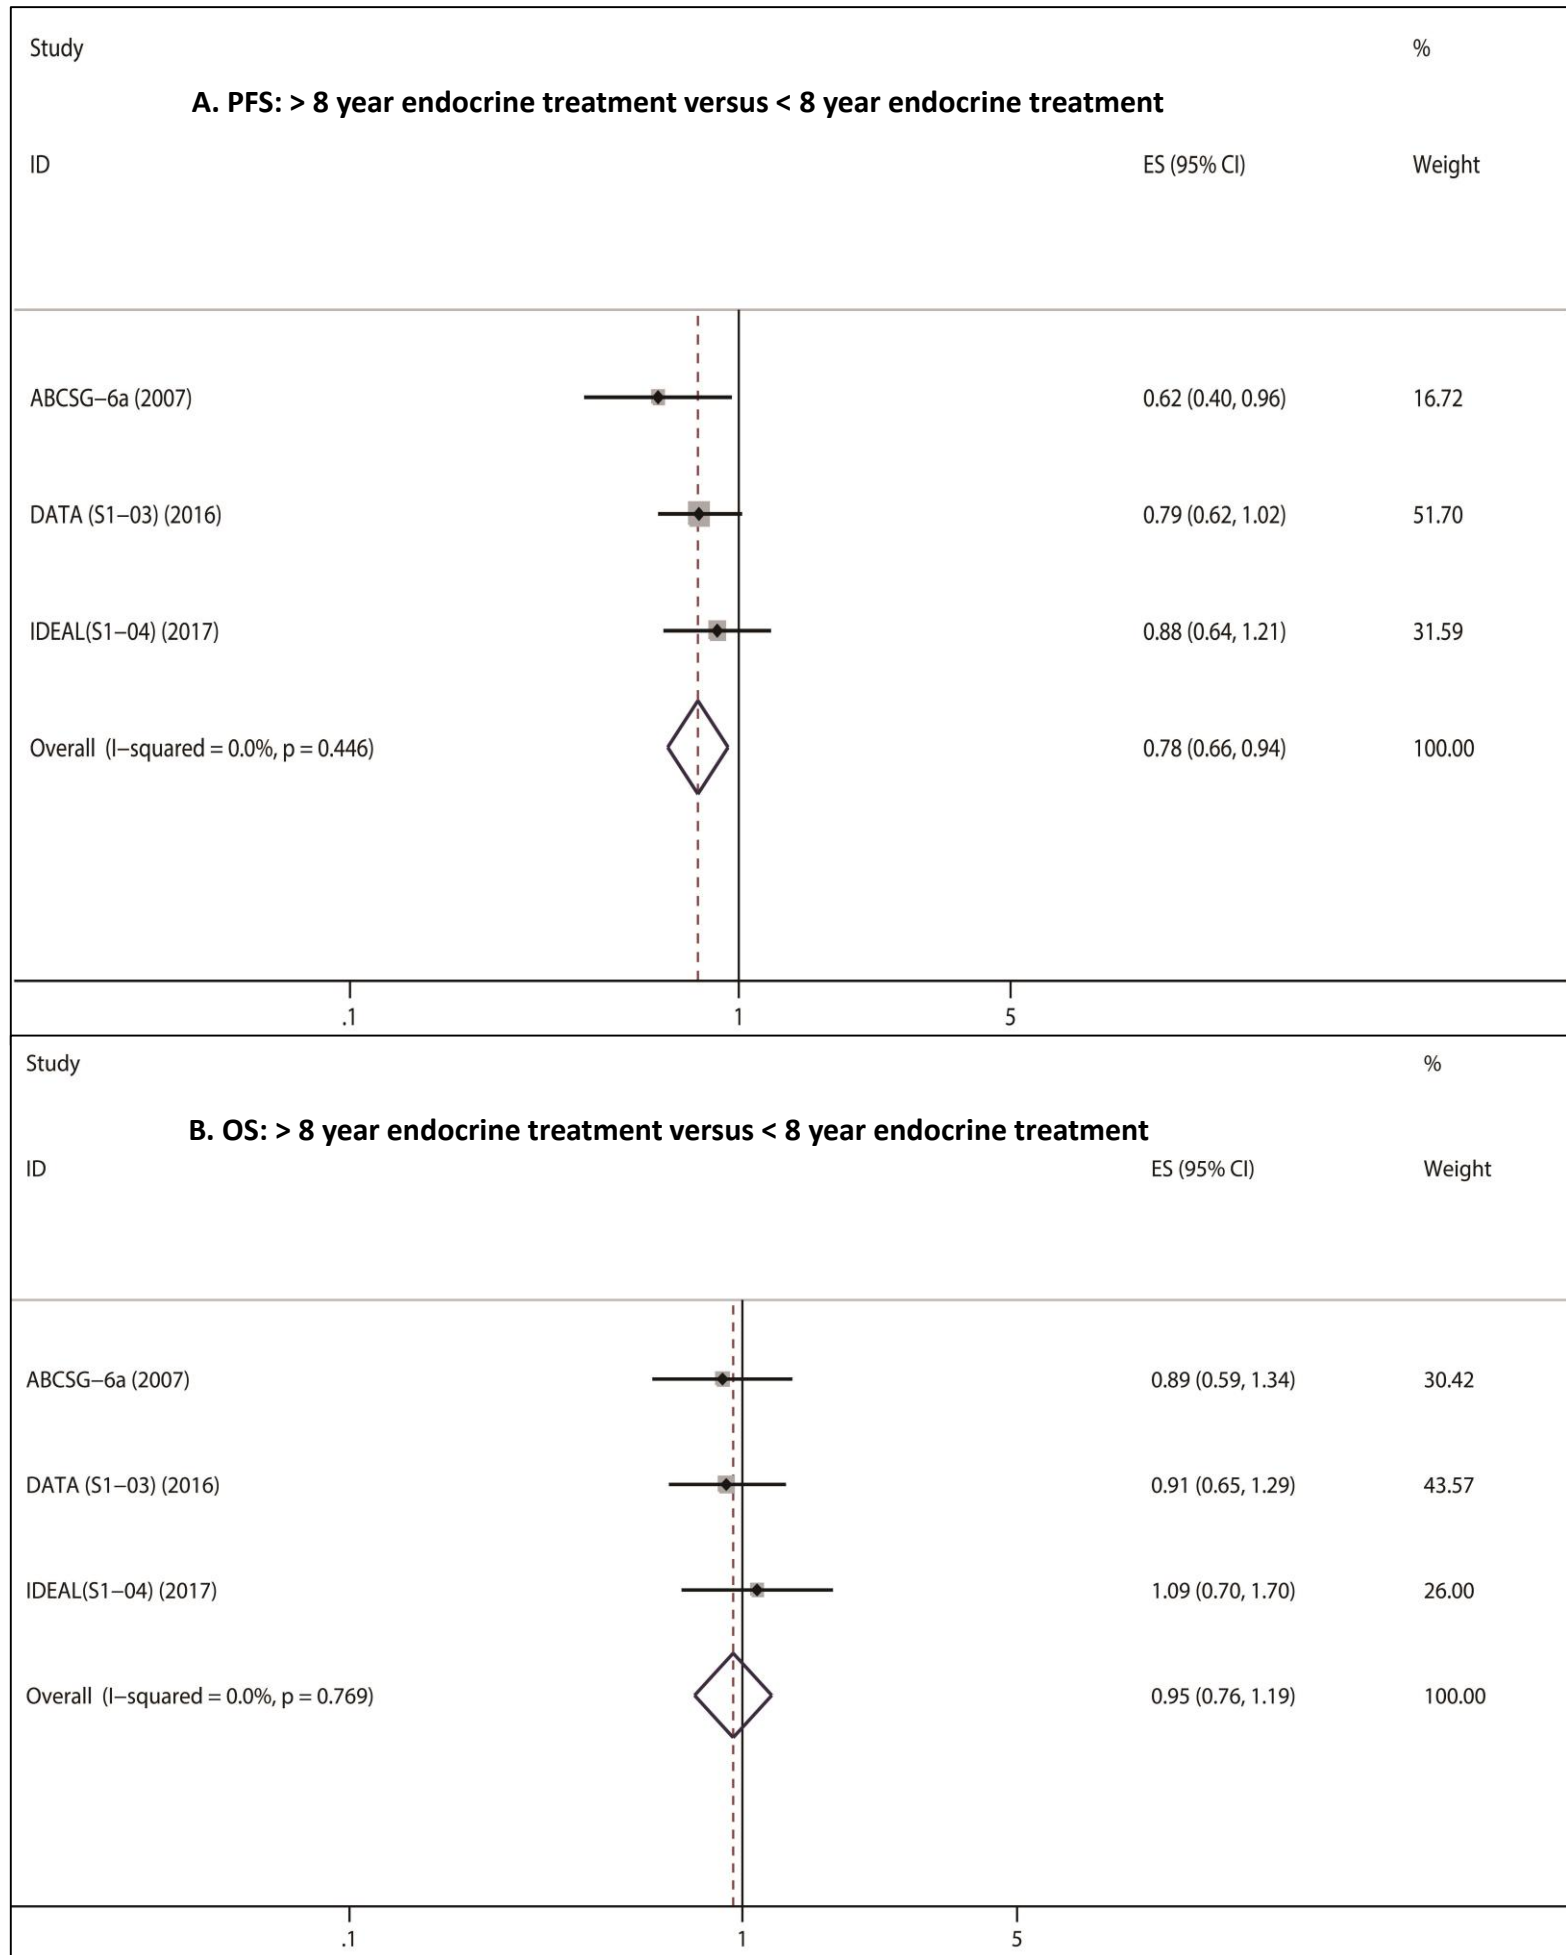

Supplement: MOESM3 [file 16195148]
